# Supplementary material for: Association between overcrowded households, multigenerational households, and COVID-19: a cohort study
Source: bioRxiv or medRxiv preprint supplement (doi:10.1101/2021.06.14.21258904), 2021-06-22
Supplement: Supplementary file [file media-1.pdf]

**eTable 1: Adjusted incidence rate ratios (IRR) of suspected COVID cases per 10,000 for quartiles of ZIP code tabulation area-level (ZCTA)<sup>1</sup>**

|                                                                                            | Model 1                  |             | Model 2                  |             | Model 3                  |             | Model 4                  |             | Model 5           |                     |
|--------------------------------------------------------------------------------------------|--------------------------|-------------|--------------------------|-------------|--------------------------|-------------|--------------------------|-------------|-------------------|---------------------|
|                                                                                            | IRR                      | 95% CI      | IRR                      | 95% CI      | IRR                      | 95% CI      | IRR                      | 95% CI      | IRR               | 95% CI <sup>¶</sup> |
| <b>Percent of overcrowded households, in quartiles<sup>2</sup> (ref: Quartile 1)</b>       |                          |             |                          |             |                          |             |                          |             |                   |                     |
| Quartile 2                                                                                 | 1.56                     | 1.47 - 1.65 | 1.22                     | 1.15 - 1.30 | 1.36                     | 1.28 - 1.45 | 1.22                     | 1.14 - 1.29 | 1.45              | 1.13 - 1.87         |
| Quartile 3                                                                                 | 1.75                     | 1.66 - 1.85 | 1.47                     | 1.39 - 1.56 | 1.43                     | 1.34 - 1.52 | 1.44                     | 1.35 - 1.54 | 1.41              | 1.08 - 1.86         |
| Quartile 4                                                                                 | 2.05                     | 1.92 - 2.18 | 1.80                     | 1.68 - 1.92 | 1.62                     | 1.50 - 1.76 | 1.58                     | 1.46 - 1.70 | 1.67              | 1.12 - 2.52         |
| <b>Percent of multigenerational households,<sup>3</sup> in quartiles (ref: Quartile 1)</b> |                          |             |                          |             |                          |             |                          |             |                   |                     |
| Quartile 2                                                                                 | 1.19                     | 1.12 - 1.26 | 1.08                     | 1.00 - 1.15 | 1.01                     | 0.94 - 1.08 | 1.17                     | 1.09 - 1.26 | 1.48              | 1.05 - 2.07         |
| Quartile 3                                                                                 | 1.30                     | 1.22 - 1.37 | 1.09                     | 1.01 - 1.18 | 1.08                     | 1.00 - 1.16 | 1.38                     | 1.27 - 1.50 | 1.89              | 1.28 - 2.78         |
| Quartile 4                                                                                 | 1.59                     | 1.49 - 1.69 | 1.03                     | 0.93 - 1.12 | 1.27                     | 1.15 - 1.39 | 1.54                     | 1.40 - 1.70 | 1.77              | 1.11 - 2.79         |
| <b>COVID-19 clinical risk factors<sup>4</sup>, by ZCTA (%)</b>                             |                          |             |                          |             |                          |             |                          |             |                   |                     |
| Prevalence of diabetes                                                                     |                          |             | 1.16                     | 1.14 - 1.18 |                          |             |                          |             |                   |                     |
| Prevalence of coronary heart disease                                                       |                          |             | 0.72                     | 0.69 - 0.74 |                          |             | 0.75                     | 0.73 - 0.78 | 0.92              | 0.82 - 1.03         |
| Prevalence of obesity (BMI ≥ 30kg/m <sup>2</sup> )                                         |                          |             | 1.01                     | 1.01 - 1.02 |                          |             | 1.03                     | 1.03 - 1.04 | 0.97              | 0.94 - 0.99         |
| Prevalence of COPD <sup>5</sup>                                                            |                          |             |                          |             |                          |             |                          |             |                   |                     |
| Prevalence of smoking <sup>6</sup>                                                         |                          |             | 0.99                     | 0.98 - 1.01 |                          |             | 0.98                     | 0.96 - 0.99 | 1.08              | 0.99 - 1.17         |
| <b>Socioeconomic characteristics,<sup>7</sup> by ZCTA</b>                                  |                          |             |                          |             |                          |             |                          |             |                   |                     |
| Percentage white                                                                           |                          |             |                          |             | 0.99                     | 0.99 - 1.00 | 0.99                     | 0.99 - 1.00 | 0.99              | 0.99 - 1.00         |
| Percent below Federal Poverty Level                                                        |                          |             |                          |             | 0.99                     | 0.98 - 0.99 | 0.97                     | 0.97 - 0.98 | 0.97              | 0.95 - 0.99         |
| Median income, USD 2018                                                                    |                          |             |                          |             | 0.99                     | 0.99 - 0.99 | 0.99                     | 0.99 - 0.99 | 0.99              | 0.99 - 0.99         |
| Percentage in defined essential worker role <sup>8</sup>                                   |                          |             |                          |             | 0.98                     | 0.97 - 0.99 | 0.96                     | 0.95 - 0.97 | 1.01              | 0.98 - 1.04         |
| <b>Time, days</b>                                                                          | 1.04                     | 1.04 - 1.05 | 1.04                     | 1.04 - 1.05 | 1.04                     | 1.04 - 1.05 | 1.04                     | 1.04 - 1.05 | 1.04              | 1.04 - 1.04         |
| <b>Space-time correlation matrix</b>                                                       | No                       |             | No                       |             | No                       |             | No                       |             | Yes               |                     |
| <b>Model specification</b>                                                                 | Generalized linear model |             | Generalized linear model |             | Generalized linear model |             | Generalized linear model |             | INLA <sup>§</sup> |                     |

1 All covariates measured as percent at ZCTA-level all models employ robust standard errors

2 Overcrowded households defined as  $> 1$  occupant per room in each household, derived from 2018 American Community Survey 5-year estimates

3 Multigenerational households defined the estimated number of residences occupied by grandparent and a grandchild less than 18 years of age, derived from 2018 American Community Survey 5-year estimates

4 Derived from the Centers of Disease Control 500 Cities project

5 COPD is chronic obstructive pulmonary disease

6 Smoking defined as residents  $\geq 18$  years who are current smoking

7 Derived from 2018 American Community Survey 5-year estimates

8 Essential worker roles defined using service-oriented, non-public Census Industrial Codes derived from methods described elsewhere<sup>18</sup>

<sup>¶</sup> 95% Bayesian credible intervals

<sup>§</sup> INLA is integrated nested Laplace approximation
